# Supplementary material for: Evaluation of the Stellae-123 prognostic gene expression signature in acute myeloid leukemia
Source: Front Oncol. 2022 Aug 17;12:968340. doi: 10.3389/fonc.2022.968340 (PMC9428690; doi:10.3389/fonc.2022.968340)
Supplement: Supplementary Table 1 — List of 69 genes included in Stellae-123. [file Table_1.xlsx]

## Sheet: Supplementary Table 1
ENSEMBL GENE ID
SEMA3C	KLRB1	PRXL2A	FAM171B	NSA2	CTC1	FAM24B
RAB21	LOX	KBTBD4	MEPCE	FZD6	FAM133A	EMP2
PSMA3	NPRL2	FAM124B	HMGA2	SLITRK5	TMEM220	CBWD6
PYGB	EFCC1	CCR7	DOCK1	CD3D	CIBAR1	AP4M1
IFT52	DHCR24	COX7C	SAR1B	DDIT4	SPOCK3	LOC105371485
ZDHHC2	CD2	CYP2E1	UBALD1	LRATD2	TOMM7	ZNF883
ERICH1	PHF3	AP3B1	FGD5	HTRA3	CD247	LINC01424
FKBP14	UBE2B	POGLUT2	CD109	UQCRH	ENSG00000204790	SHANK3
HSPB1	SOCS2	CPM	CDC42SE2	SH3PXD2B	HBM	MINCR
FAM20A	ZNF706	ENPP2	F2RL1	ERCC6L2-AS1	IGHM

## Sheet: Supplementary Table 2
	BeatAML
Gene	Lower Tertile	Intermediate Tertile	Higher Tertile
ASXL1	0.94% (1)	5.66% (6)	17.92% (19)
CEBPA	16.04% (17)	5.66% (6)	0% (0)
DNMT3A	19.81% (21)	27.36% (29)	10.38% (10)
EZH2	3.77% (4)	1.89% (2)	5.66% (6)
FLT3	15.09% (16)	13.21% (14)	5.66% (6)
IDH1	8.49% (9)	8.49% (9)	4.72% (5)
IDH2	12.26% (13)	13.21% (14)	10.38% (11)
NPM1	30.19% (32)	26.42% (28)	4.72% (5)
RUNX1	1.89% (2)	9.43% (10)	19.81% (21)
SF3A1	0.94% (1)	0% (0)	0.94% (1)
SF3B1	4.72% (5)	3.77% (4)	3.77% (4)
SRSF2	7.55% (8)	8.49% (9)	17.92% (19)
TET2	8.49% (9)	16.04% (17)	13.21% (14)
TP53	1.89% (2)	0.94% (1)	23.58% (25)
U2AF1	0% (0)	3.77% (4)	10.38% (11)
U2AF2	0% (0)	0% (0)	0% (0)
ZRSR2	0% (0)	0.94% (1)	4.72% (5)

## Sheet: Supplementary Table 3
	AMLCG-2008
Gene	Lower Tertile	Intermediate Tertile	Higher Tertile
ASXL1	1.49% (1)	4.55% (3)	30.30% (20)
CEBPA	10.45% (7)	0% (0)	1.51% (1)
DNMT3A	41.79% (28)	33.33% (22)	24.24% (16)
EZH2	2.99% (2)	0% (0)	3.03% (2)
FLT3-ITD	11.94% (8)	33.33% (22)	15.15% (10)
FLT3-TKD	13.43% (9)	15.15% (10)	1.51% (1)
IDH1	8.96% (6)	3.03% (2)	7.58% (5)
IDH2	11.94% (8)	15.15% (10)	13.64% (9)
NPM1	52.24% (35)	50.00% (33)	9.09% (6)
RUNX1	7.46% (5)	9.09% (6)	33.33% (22)
SF3A1	0% (0)	1.52% (1)	0% (0)
SF3B1	1.49% (1)	1.52% (1)	4.55% (3)
SRSF2	4.48% (3)	7.58% (5)	16.67% (11)
TET2	14.92% (10)	13.64% (9)	16.67% (11)
TP53	1.49% (1)	0% (0)	15.15% (10)
U2AF1	0% (0)	1.52% (1)	9.09% (6)
U2AF2	1.49% (1)	0% (0)	0% (0)
ZRSR2	0% (0)	0% (0)	1.51% (1)

## Sheet: Supplementary Table 4
	TARGET AML
Gene	Lower Tertile	Intermediate Tertile	Higher Tertile
ASXL1	0% (0)	0% (0)	0% (0)
CEBPA	13.79% (4)	10.00% (3)	0% (0)
EZH2	3.45% (1)	3.33% (1)	8.70% (2)
FLT3-ITD	10.34% (3)	16.67% (5)	4.35% (1)
FLT3-TKD	13.79% (4)	16.67% (5)	8.70% (2)
IDH1	0% (0)	0% (0)	0% (0)
IDH2	3.45% (1)	3.33% (1)	0% (0)
KIT	34.48% (10)	13.33% (4)	13.04% (3)
NPM1	3.45% (1)	6.67% (2)	0% (0)
RUNX1	3.45% (1)	3.33% (1)	0% (0)
TET2	13.79% (4)	0% (0)	0% (0)
TP53	0% (0)	0% (0)	0% (0)
U2AF1	0% (0)	0% (0)	4.35% (1)
